# Supplementary material
Source: PubMed Central journal article supplement (PMC4615735)

**FIGURE S1.**

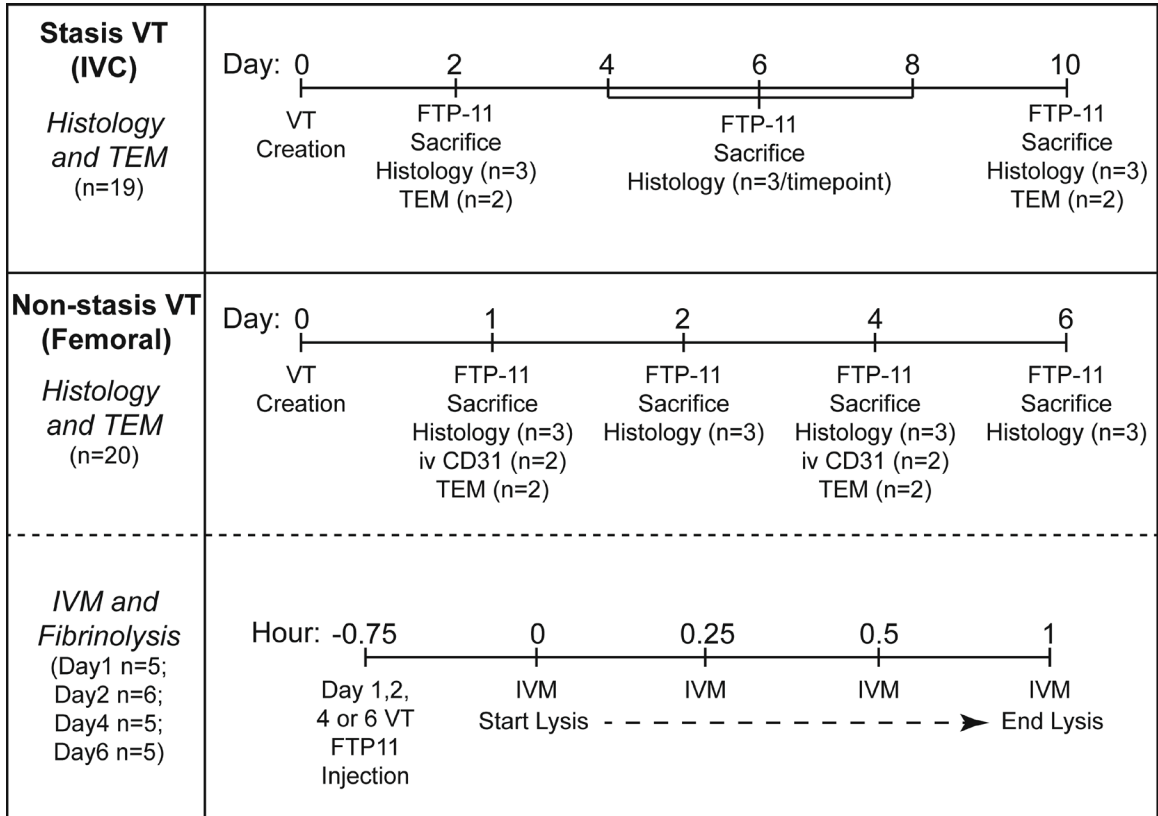

**FIGURE S2.**

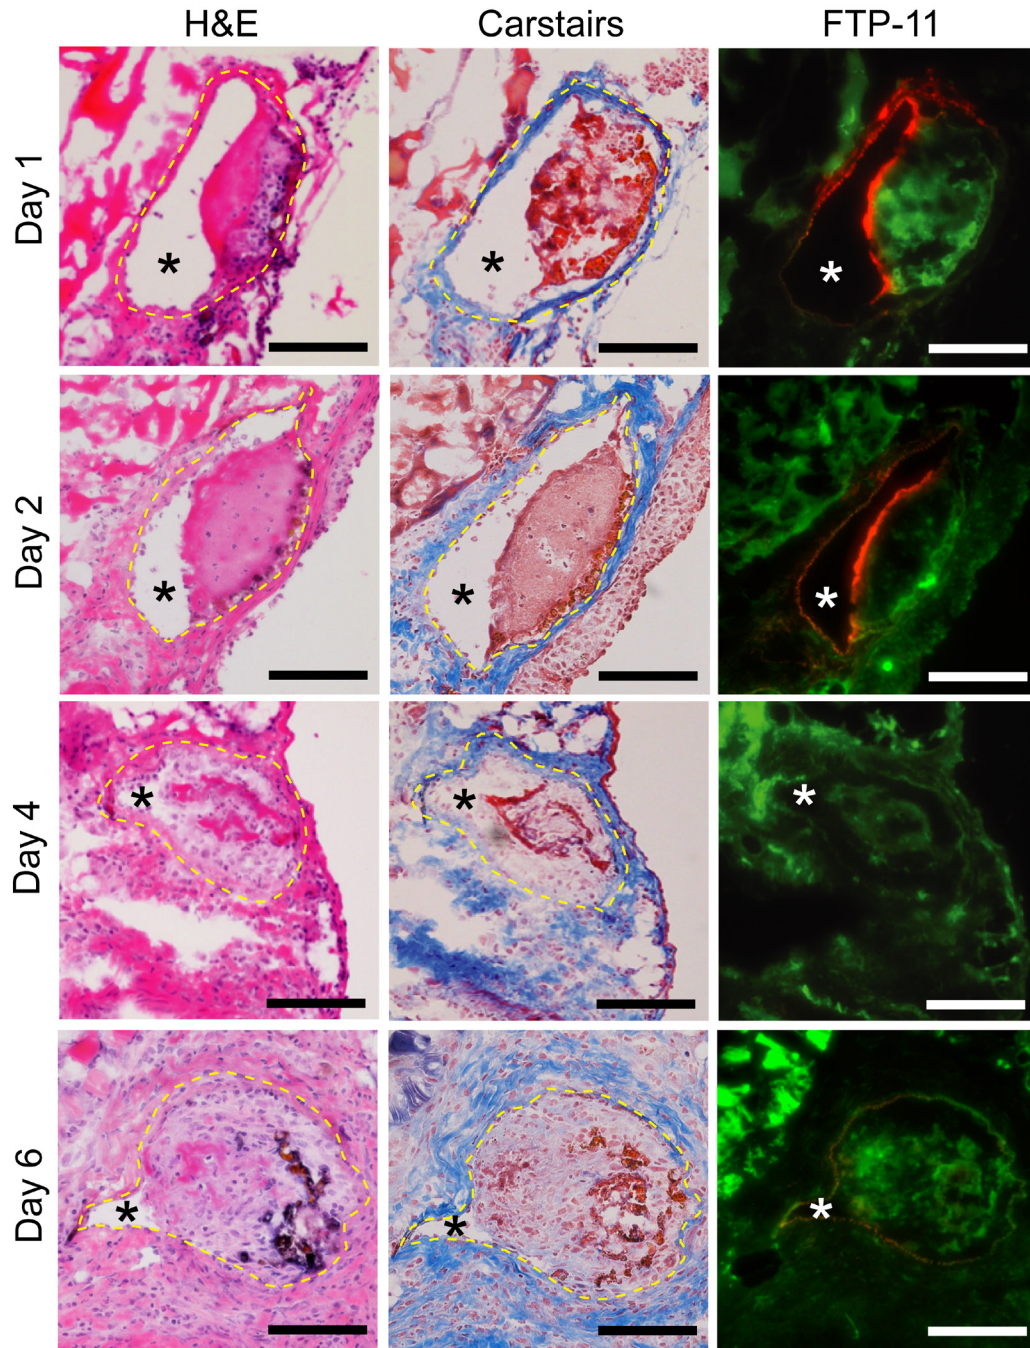

FIGURE S3.

## Non-stasis DVT

---

Early Day 1

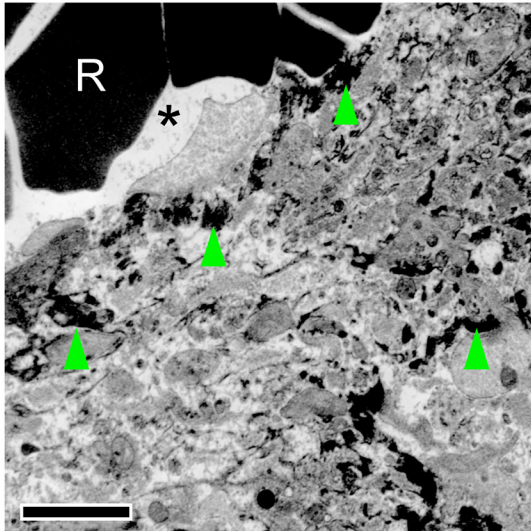

Subacute Day 4

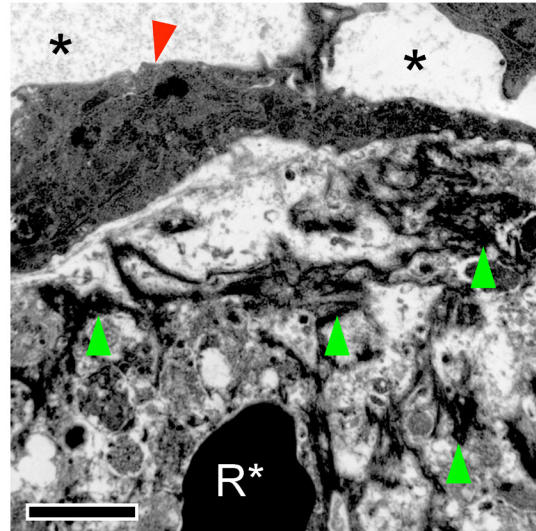

**FIGURE S4.**

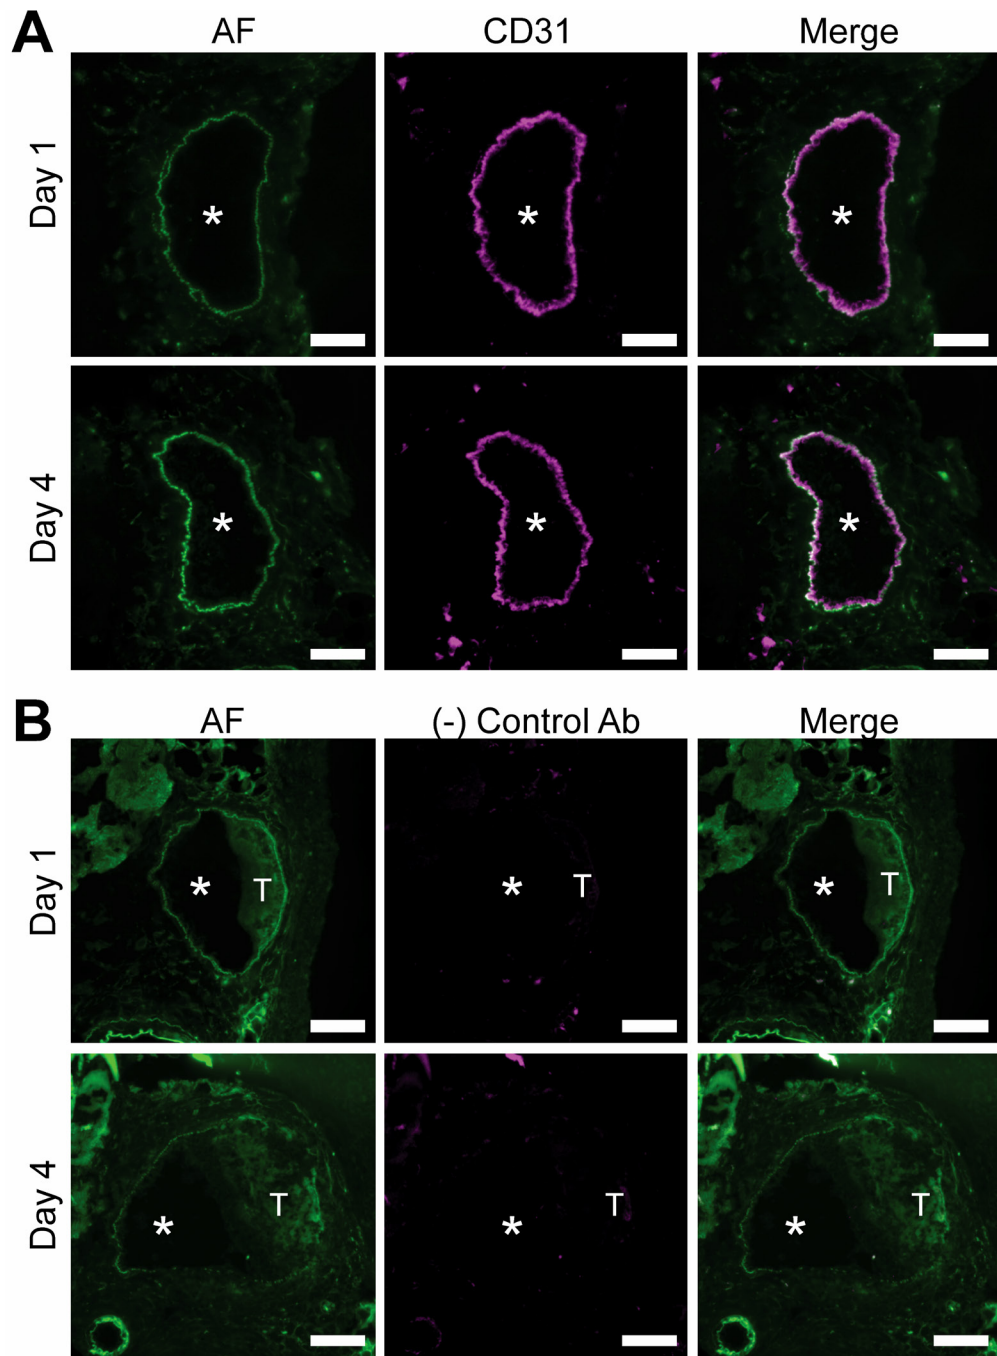

FIGURE S5.

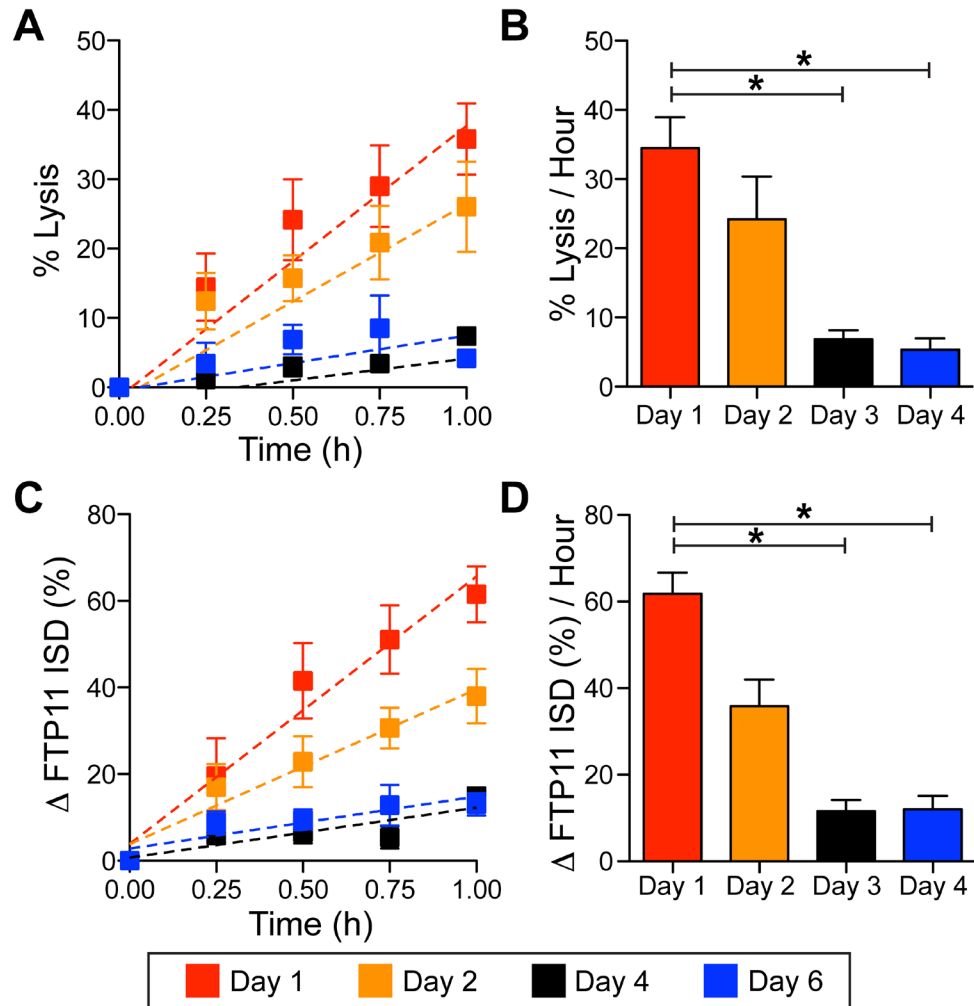

**FIGURE S6.**

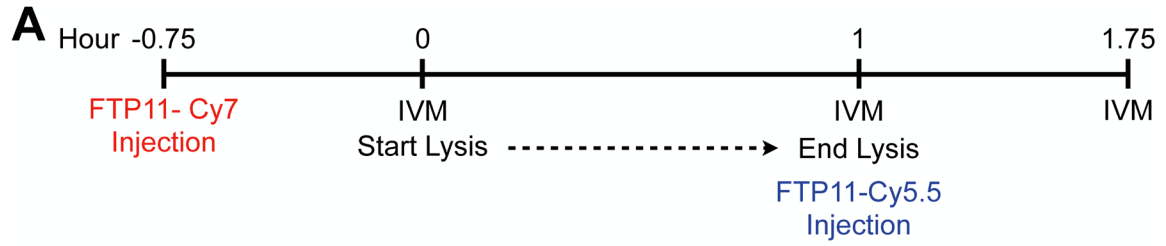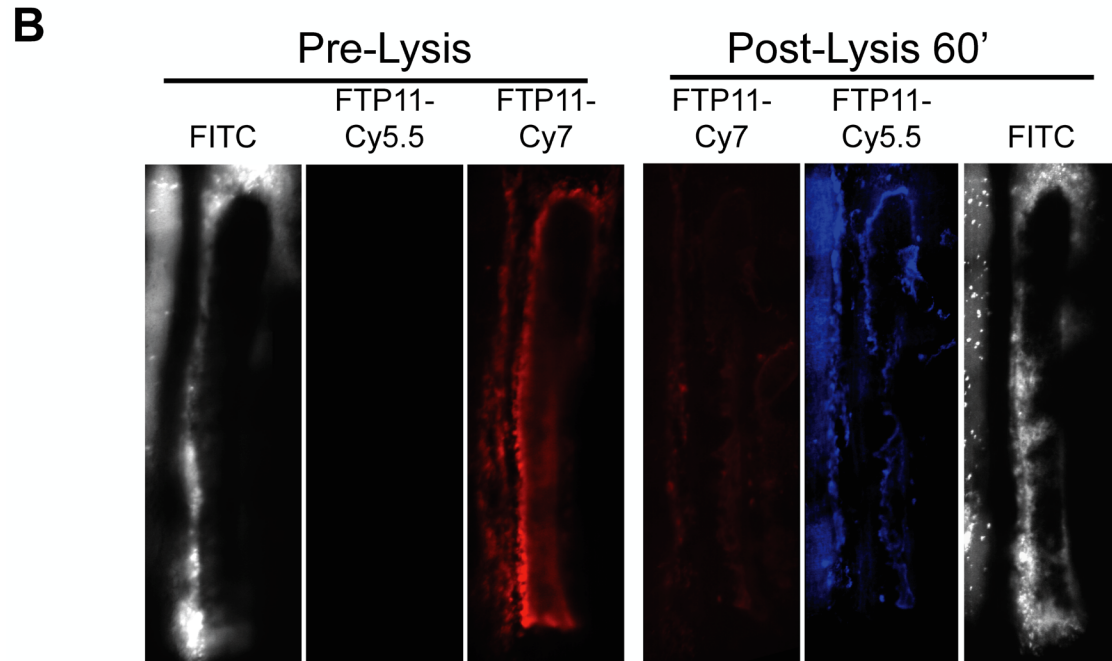

**FIGURE S7**

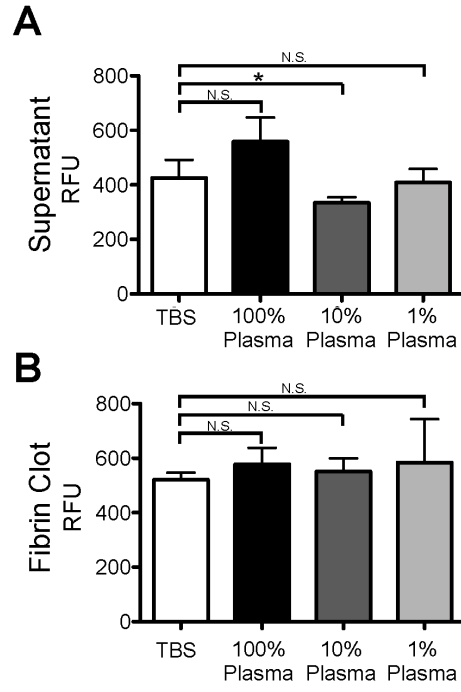

**FIGURE S8**

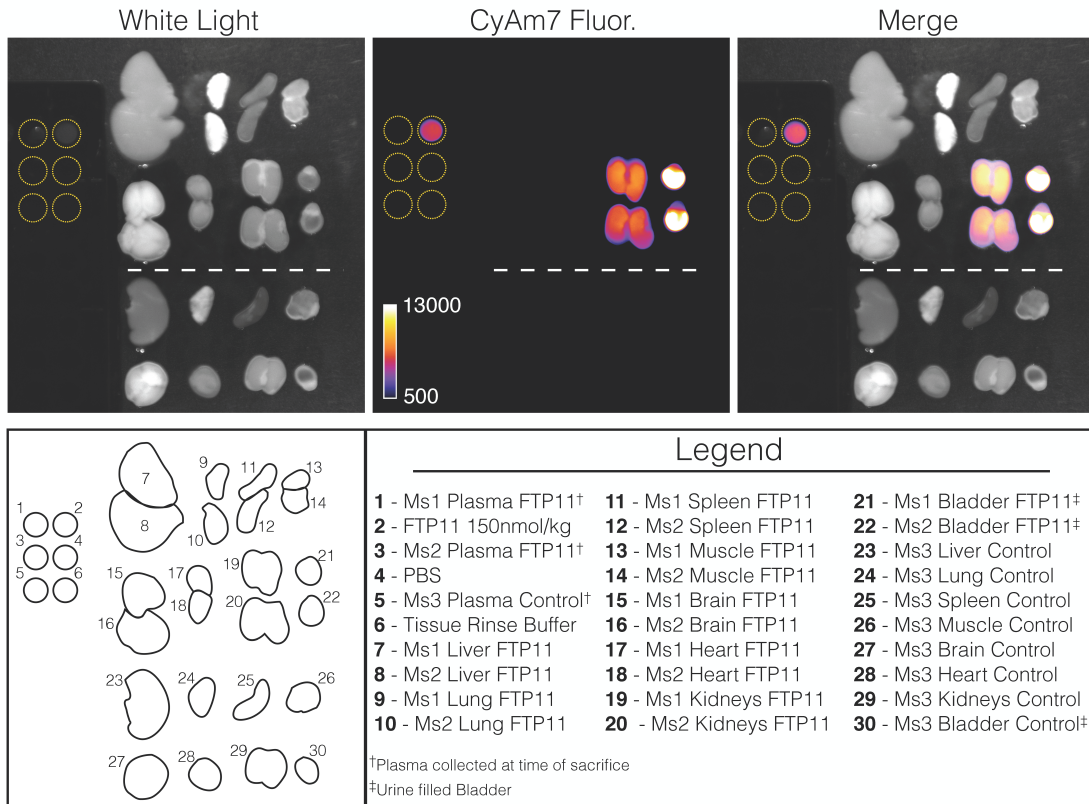

Supplement: thnov05p1317s1.pdf [file thnov05p1317s1.pdf]
